# Supplementary material for: Frequency and determinants of misuse of augmentation of labor in France: A population-based study
Source: PubMed Central journal article supplement (PMC7872232; doi:10.1371/journal.pone.0246729), 2021-02-09
Supplement: pone.0246729.s001.pdf [file pone.0246729.s001.pdf]

S1 Table. Rate and characteristics of rupture of the membranes and oxytocin infusion in the groups of augmentation of labor

|                                                                                      | Standard use<br>of AL<br>N= 3225 | Misuse<br>of AL<br>N= 1524 |
|--------------------------------------------------------------------------------------|----------------------------------|----------------------------|
| Women with intact membranes at admission, n(%)                                       | 2983 (92.5)                      | 1462 (95.9)                |
| Women receiving artificial ROM if membranes were intact at admission, n(%)           | 1939 (65.0)                      | 1131 (77.4)                |
| Duration between admission and artificial ROM when performed, hours, median $\pm$ SD | 2.2 $\pm$ 1.7                    | 1.0 $\pm$ 1.4              |
| Women with artificial ROM <1 hour after admission if membranes intact, n(%)          | NA                               | 591 (40.4)                 |
| Women with oxytocin infusion during labor, n(%)                                      | 2112 (65.5)                      | 1178 (77.3)                |
| Duration between admission and oxytocin infusion, hours, median $\pm$ SD             | 3.2 $\pm$ 3.0                    | 1.5 $\pm$ 1.8              |
| Women with oxytocin infusion <1 hour after admission, n(%)                           | NA                               | 410 (26.9)                 |
| Women with oxytocin infusion if membranes intact on admission, n(%)                  | 1870 (62.7)                      | 1116 (76.3)                |
| Duration between ROM and oxytocin infusion if ROM during labor, median $\pm$ SD      | 3.0 $\pm$ 4.2                    | 0.6 $\pm$ 1.8              |
| Women with duration between ROM and oxytocin infusion <1 hour, n(%)                  | NA                               | 857 (56.2)                 |

*AL= Augmentation of Labor*

*NA= not applicable*
